# Supplementary material for: In silico Approach for Unveiling the Glycoside Hydrolase Activities in Faecalibacterium prausnitzii Through a Systematic and Integrative Large-Scale Analysis
Source: Front Microbiol. 2019 Apr 4;10:517. doi: 10.3389/fmicb.2019.00517 (PMC6460054; doi:10.3389/fmicb.2019.00517)
Supplement: TABLE S1 — List of the amino acid sequences of the glycoside hydrolases in two fasta files fpa.fasta (corresponds to F. prausnitzii SL3/3) and fpr.fasta (corresponds to F. prausntizii L2-6). [file Table_1.XLSX]

## Sheet: fpa references
	ENTRY	DEFINITION	PATHWAY	ORGANISM	ENZYME
	FPR_12120 CDS T02592	(GenBank) glycogen/starch/alpha-glucan phosphorylases	fpa00500 Starch and sucrose metabolism fpa01100 Metabolic pathways fpa01110 Biosynthesis of secondary metabolites	fpa Faecalibacterium prausnitzii SL3/3	EC 2.4.1.1
	FPR_21480 CDS T02592	(GenBank) glycogen/starch/alpha-glucan phosphorylases	fpa00500 Starch and sucrose metabolism fpa01100 Metabolic pathways fpa01110 Biosynthesis of secondary metabolites	fpa Faecalibacterium prausnitzii SL3/3	EC 2.4.1.1
	FPR_03010 CDS T02592	(GenBank) alpha-1,4-glucan:alpha-1,4-glucan 6-glycosyltransferase	fpa00500 Starch and sucrose metabolism fpa01100 Metabolic pathways fpa01110 Biosynthesis of secondary metabolites	fpa Faecalibacterium prausnitzii SL3/3	EC 2.4.1.18
	FPR_13510 CDS T02592	(GenBank) alpha-1,4-glucan:alpha-1,4-glucan 6-glycosyltransferase	fpa00500 Starch and sucrose metabolism fpa01100 Metabolic pathways fpa01110 Biosynthesis of secondary metabolites	fpa Faecalibacterium prausnitzii SL3/3	EC 2.4.1.18
	FPR_05900 CDS T02592	(GenBank) cellobiose phosphorylase	fpa00500 Starch and sucrose metabolism fpa01100 Metabolic pathways	fpa Faecalibacterium prausnitzii SL3/3	EC 2.4.1.20
	FPR_13470 CDS T02592	(GenBank) glycogen/starch synthases, ADP-glucose type	fpa00500 Starch and sucrose metabolism fpa01100 Metabolic pathways fpa01110 Biosynthesis of secondary metabolites	fpa Faecalibacterium prausnitzii SL3/3	EC 2.4.1.21
	FPR_10020 CDS T02592	(GenBank) 4-alpha-glucanotransferase	fpa00500 Starch and sucrose metabolism fpa01100 Metabolic pathways	fpa Faecalibacterium prausnitzii SL3/3	EC 2.4.1.25
	FPR_24180 CDS T02592	(GenBank) 4-alpha-glucanotransferase	fpa00500 Starch and sucrose metabolism fpa01100 Metabolic pathways	fpa Faecalibacterium prausnitzii SL3/3	EC 2.4.1.25
	FPR_03010 CDS T02592	(GenBank) alpha-1,4-glucan:alpha-1,4-glucan 6-glycosyltransferase	fpa00500 Starch and sucrose metabolism fpa01100 Metabolic pathways fpa01110 Biosynthesis of secondary metabolites	fpa Faecalibacterium prausnitzii SL3/3	EC 2.4.1.18
	FPR_13510 CDS T02592	(GenBank) alpha-1,4-glucan:alpha-1,4-glucan 6-glycosyltransferase	fpa00500 Starch and sucrose metabolism fpa01100 Metabolic pathways fpa01110 Biosynthesis of secondary metabolites	fpa Faecalibacterium prausnitzii SL3/3	EC 2.4.1.18
	FPR_05900 CDS T02592	(GenBank) cellobiose phosphorylase	fpa00500 Starch and sucrose metabolism fpa01100 Metabolic pathways	fpa Faecalibacterium prausnitzii SL3/3	EC 2.4.1.20
	FPR_10020 CDS T02592	(GenBank) 4-alpha-glucanotransferase	fpa00500 Starch and sucrose metabolism fpa01100 Metabolic pathways	fpa Faecalibacterium prausnitzii SL3/3	EC 2.4.1.25
	FPR_24180 CDS T02592	(GenBank) 4-alpha-glucanotransferase	fpa00500 Starch and sucrose metabolism fpa01100 Metabolic pathways	fpa Faecalibacterium prausnitzii SL3/3	EC 2.4.1.25
	FPR_27530 CDS T02592	(GenBank) conserved hypothetical protein TIGR02336		fpa Faecalibacterium prausnitzii SL3/3	EC 2.4.1.211
	FPR_17220 CDS T02592	(GenBank) Predicted glycosylase		fpa Faecalibacterium prausnitzii SL3/3	EC 2.4.1.281
	FPR_17240 CDS T02592	(GenBank) Predicted glycosylase		fpa Faecalibacterium prausnitzii SL3/3	EC 2.4.1.319
	FPR_17240 CDS T02592	(GenBank) Predicted glycosylase		fpa Faecalibacterium prausnitzii SL3/3	EC 2.4.1.320
	FPR_06940 CDS T02592	(GenBank) purine nucleoside phosphorylase I, inosine and guanosine-specific	fpa00230 Purine metabolism fpa00240 Pyrimidine metabolism fpa00760 Nicotinate and nicotinamide metabolism fpa01100 Metabolic pathways fpa01110 Biosynthesis of secondary metabolites	fpa Faecalibacterium prausnitzii SL3/3	EC 2.4.2.1
	FPR_20750 CDS T02592	(GenBank) purine-nucleoside phosphorylase	fpa00230 Purine metabolism fpa00240 Pyrimidine metabolism fpa00760 Nicotinate and nicotinamide metabolism fpa01100 Metabolic pathways fpa01110 Biosynthesis of secondary metabolites	fpa Faecalibacterium prausnitzii SL3/3	EC 2.4.2.1
	FPR_21760 CDS T02592	(GenBank) thymidine phosphorylase	fpa00240 Pyrimidine metabolism fpa01100 Metabolic pathways	fpa Faecalibacterium prausnitzii SL3/3	EC 2.4.2.2
	FPR_06700 CDS T02592	(GenBank) Adenine/guanine phosphoribosyltransferases and related PRPP-binding proteins	fpa00230 Purine metabolism fpa01100 Metabolic pathways	fpa Faecalibacterium prausnitzii SL3/3	EC 2.4.2.7
	FPR_21670 CDS T02592	(GenBank) hypoxanthine phosphoribosyltransferase	fpa00230 Purine metabolism fpa01100 Metabolic pathways fpa01110 Biosynthesis of secondary metabolites	fpa Faecalibacterium prausnitzii SL3/3	EC 2.4.2.8
	FPR_06040 CDS T02592	(GenBank) uracil phosphoribosyltransferase	fpa00240 Pyrimidine metabolism fpa01100 Metabolic pathways	fpa Faecalibacterium prausnitzii SL3/3	EC 2.4.2.9
	FPR_16810 CDS T02592	(GenBank) orotate phosphoribosyltransferase, Thermus family	fpa00240 Pyrimidine metabolism fpa01100 Metabolic pathways	fpa Faecalibacterium prausnitzii SL3/3	EC 2.4.2.10
	FPR_18380 CDS T02592	(GenBank) hypothetical protein	fpa00240 Pyrimidine metabolism fpa01100 Metabolic pathways	fpa Faecalibacterium prausnitzii SL3/3	EC 2.4.2.10
	FPR_25950 CDS T02592	(GenBank) amidophosphoribosyltransferase	fpa00230 Purine metabolism fpa00250 Alanine, aspartate and glutamate metabolism fpa01100 Metabolic pathways fpa01110 Biosynthesis of secondary metabolites fpa01130 Biosynthesis of antibiotics	fpa Faecalibacterium prausnitzii SL3/3	EC 2.4.2.14
	FPR_29140 CDS T02592	(GenBank) nicotinate-nucleotide--dimethylbenzimidazole phosphoribosyltransferase	fpa00860 Porphyrin and chlorophyll metabolism fpa01100 Metabolic pathways MODULE fpa_M00122 Cobalamin biosynthesis, cobinamide => cobalamin	fpa Faecalibacterium prausnitzii SL3/3	EC 2.4.2.21
	FPR_16670 CDS T02592	(GenBank) xanthine phosphoribosyltransferase	fpa00230 Purine metabolism fpa01100 Metabolic pathways fpa01110 Biosynthesis of secondary metabolites	fpa Faecalibacterium prausnitzii SL3/3	EC 2.4.2.22
	FPR_30570 CDS T02592	(GenBank) tRNA-guanine transglycosylase		fpa Faecalibacterium prausnitzii SL3/3	EC 2.4.2.29
	FPR_11220 CDS T02592	(GenBank) Pectin methylesterase	fpa00040 Pentose and glucuronate interconversions fpa01100 Metabolic pathways	fpa Faecalibacterium prausnitzii SL3/3	EC 3.1.1.11
	FPR_06900 CDS T02592	(GenBank) Uncharacterized conserved protein		fpa Faecalibacterium prausnitzii SL3/3	EC 3.1.1.29
	FPR_15040 CDS T02592	(GenBank) peptidyl-tRNA hydrolase		fpa Faecalibacterium prausnitzii SL3/3	EC 3.1.1.29
	FPR_07280 CDS T02592	(GenBank) Alpha-glucosidases, family 31 of glycosyl hydrolases	fpa00052 Galactose metabolism fpa00500 Starch and sucrose metabolism fpa01100 Metabolic pathways	fpa Faecalibacterium prausnitzii SL3/3	EC 3.2.1.20
	FPR_09740 CDS T02592	(GenBank) Beta-glucosidase-related glycosidases	fpa00460 Cyanoamino acid metabolism fpa00500 Starch and sucrose metabolism fpa01100 Metabolic pathways fpa01110 Biosynthesis of secondary metabolites	fpa Faecalibacterium prausnitzii SL3/3	EC 3.2.1.21
	FPR_09750 CDS T02592	(GenBank) Beta-glucosidase-related glycosidases	fpa00460 Cyanoamino acid metabolism fpa00500 Starch and sucrose metabolism fpa01100 Metabolic pathways fpa01110 Biosynthesis of secondary metabolites	fpa Faecalibacterium prausnitzii SL3/3	EC 3.2.1.21
	FPR_25480 CDS T02592	(GenBank) aryl-beta-glucosidase	fpa00460 Cyanoamino acid metabolism fpa00500 Starch and sucrose metabolism fpa01100 Metabolic pathways fpa01110 Biosynthesis of secondary metabolites	fpa Faecalibacterium prausnitzii SL3/3	EC 3.2.1.21
	FPR_17200 CDS T02592	(GenBank) Alpha-galactosidase	fpa00052 Galactose metabolism fpa00561 Glycerolipid metabolism fpa00600 Sphingolipid metabolism fpa01100 Metabolic pathways	fpa Faecalibacterium prausnitzii SL3/3	EC 3.2.1.22
	FPR_23960 CDS T02592	(GenBank) Alpha-galactosidase	fpa00052 Galactose metabolism fpa00561 Glycerolipid metabolism fpa00600 Sphingolipid metabolism fpa01100 Metabolic pathways	fpa Faecalibacterium prausnitzii SL3/3	EC 3.2.1.22
	FPR_14660 CDS T02592	(GenBank) Beta-galactosidase/beta-glucuronidase	fpa00052 Galactose metabolism fpa00511 Other glycan degradation fpa00600 Sphingolipid metabolism fpa01100 Metabolic pathways	fpa Faecalibacterium prausnitzii SL3/3	EC 3.2.1.23
	FPR_23930 CDS T02592	(GenBank) Beta-galactosidase/beta-glucuronidase	fpa00052 Galactose metabolism fpa00511 Other glycan degradation fpa00600 Sphingolipid metabolism fpa01100 Metabolic pathways	fpa Faecalibacterium prausnitzii SL3/3	EC 3.2.1.23
	FPR_25460 CDS T02592	(GenBank) Beta-galactosidase/beta-glucuronidase	fpa00052 Galactose metabolism fpa00511 Other glycan degradation fpa00600 Sphingolipid metabolism fpa01100 Metabolic pathways	fpa Faecalibacterium prausnitzii SL3/3	EC 3.2.1.23
	FPR_27540 CDS T02592	(GenBank) Beta-galactosidase/beta-glucuronidase	fpa00052 Galactose metabolism fpa00511 Other glycan degradation fpa00600 Sphingolipid metabolism fpa01100 Metabolic pathways	fpa Faecalibacterium prausnitzii SL3/3	EC 3.2.1.23
	FPR_25320 CDS T02592	(GenBank) Beta-galactosidase/beta-glucuronidase	fpa00040 Pentose and glucuronate interconversions fpa00860 Porphyrin and chlorophyll metabolism fpa01100 Metabolic pathways fpa01110 Biosynthesis of secondary metabolites	fpa Faecalibacterium prausnitzii SL3/3	EC 3.2.1.31
	FPR_25430 CDS T02592	(GenBank) Alpha-L-rhamnosidase N-terminal domain./Bacterial alpha-L-rhamnosidase.		fpa Faecalibacterium prausnitzii SL3/3	EC 3.2.1.40
	FPR_10150 CDS T02592	(GenBank) pullulanase, type I	fpa00500 Starch and sucrose metabolism fpa01100 Metabolic pathways fpa01110 Biosynthesis of secondary metabolites	fpa Faecalibacterium prausnitzii SL3/3	EC 3.2.1.41
	FPR_14930 CDS T02592	(GenBank) 6-phospho-beta-glucosidase	fpa00010 Glycolysis / Gluconeogenesis fpa00500 Starch and sucrose metabolism	fpa Faecalibacterium prausnitzii SL3/3	EC 3.2.1.86
	FPR_15320 CDS T02592	(GenBank) 6-phospho-beta-glucosidase	fpa00010 Glycolysis / Gluconeogenesis fpa00500 Starch and sucrose metabolism	fpa Faecalibacterium prausnitzii SL3/3	EC 3.2.1.86
	FPR_25170 CDS T02592	(GenBank) Beta-glucosidase/6-phospho-beta-glucosidase/beta-galactosid ase	fpa00010 Glycolysis / Gluconeogenesis fpa00500 Starch and sucrose metabolism	fpa Faecalibacterium prausnitzii SL3/3	EC 3.2.1.86
	FPR_08860 CDS T02592	(GenBank) Alpha-galactosidases/6-phospho-beta-glucosidases, family 4 of glycosyl hydrolases	fpa00500 Starch and sucrose metabolism	fpa Faecalibacterium prausnitzii SL3/3	EC 3.2.1.122
	FPR_02050 CDS T02592	(GenBank) Predicted unsaturated glucuronyl hydrolase involved in regulation of bacterial surface properties, and related proteins		fpa Faecalibacterium prausnitzii SL3/3	EC 3.2.1.172

## Sheet: fpr references
	ENTRY	DEFINITION	PATHWAY	ORGANISM	ENZYME
	FP2_15900 CDS T02591	(GenBank) glycogen/starch/alpha-glucan phosphorylases	fpr00500 Starch and sucrose metabolism fpr01100 Metabolic pathways fpr01110 Biosynthesis of secondary metabolites	fpr Faecalibacterium prausnitzii L2-6	EC 2.4.1.1
	FP2_08630 CDS T02591	(GenBank) Glycosidases	fpr00500 Starch and sucrose metabolism	fpr Faecalibacterium prausnitzii L2-6	EC 2.4.1.4
	FP2_14400 CDS T02591	(GenBank) alpha-1,4-glucan:alpha-1,4-glucan 6-glycosyltransferase	fpr00500 Starch and sucrose metabolism fpr01100 Metabolic pathways fpr01110 Biosynthesis of secondary metabolites	fpr Faecalibacterium prausnitzii L2-6	EC 2.4.1.18
	FP2_26860 CDS T02591	(GenBank) alpha-1,4-glucan:alpha-1,4-glucan 6-glycosyltransferase	fpr00500 Starch and sucrose metabolism fpr01100 Metabolic pathways fpr01110 Biosynthesis of secondary metabolites	fpr Faecalibacterium prausnitzii L2-6	EC 2.4.1.18
	FP2_14430 CDS T02591	(GenBank) glycogen/starch synthases, ADP-glucose type	fpr00500 Starch and sucrose metabolism fpr01100 Metabolic pathways fpr01110 Biosynthesis of secondary metabolites	fpr Faecalibacterium prausnitzii L2-6	EC 2.4.1.21
	FP2_13480 CDS T02591	(GenBank) 4-alpha-glucanotransferase	fpr00500 Starch and sucrose metabolism fpr01100 Metabolic pathways	fpr Faecalibacterium prausnitzii L2-6	EC 2.4.1.25
	FP2_18390 CDS T02591	(GenBank) 4-alpha-glucanotransferase	fpr00500 Starch and sucrose metabolism fpr01100 Metabolic pathways	fpr Faecalibacterium prausnitzii L2-6	EC 2.4.1.25
	FP2_08630 CDS T02591	(GenBank) Glycosidases	fpr00500 Starch and sucrose metabolism	fpr Faecalibacterium prausnitzii L2-6	EC 2.4.1.4
	FP2_14400 CDS T02591	(GenBank) alpha-1,4-glucan:alpha-1,4-glucan 6-glycosyltransferase	fpr00500 Starch and sucrose metabolism fpr01100 Metabolic pathways fpr01110 Biosynthesis of secondary metabolites	fpr Faecalibacterium prausnitzii L2-6	EC 2.4.1.18
	FP2_26860 CDS T02591	(GenBank) alpha-1,4-glucan:alpha-1,4-glucan 6-glycosyltransferase	fpr00500 Starch and sucrose metabolism fpr01100 Metabolic pathways fpr01110 Biosynthesis of secondary metabolites	fpr Faecalibacterium prausnitzii L2-6	EC 2.4.1.18
	FP2_13480 CDS T02591	(GenBank) 4-alpha-glucanotransferase	fpr00500 Starch and sucrose metabolism fpr01100 Metabolic pathways	fpr Faecalibacterium prausnitzii L2-6	EC 2.4.1.25
	FP2_18390 CDS T02591	(GenBank) 4-alpha-glucanotransferase	fpr00500 Starch and sucrose metabolism fpr01100 Metabolic pathways	fpr Faecalibacterium prausnitzii L2-6	EC 2.4.1.25
	FP2_19420 CDS T02591	(GenBank) conserved hypothetical protein TIGR02336		fpr Faecalibacterium prausnitzii L2-6	EC 2.4.1.211
	FP2_03890 CDS T02591	(GenBank) purine nucleoside phosphorylase I, inosine and guanosine-specific	fpr00230 Purine metabolism fpr00240 Pyrimidine metabolism fpr00760 Nicotinate and nicotinamide metabolism fpr01100 Metabolic pathways fpr01110 Biosynthesis of secondary metabolites	fpr Faecalibacterium prausnitzii L2-6	EC 2.4.2.1
	FP2_09830 CDS T02591	(GenBank) purine-nucleoside phosphorylase	fpr00230 Purine metabolism fpr00240 Pyrimidine metabolism fpr00760 Nicotinate and nicotinamide metabolism fpr01100 Metabolic pathways fpr01110 Biosynthesis of secondary metabolites	fpr Faecalibacterium prausnitzii L2-6	EC 2.4.2.1
	FP2_09890 CDS T02591	(GenBank) thymidine phosphorylase	fpr00240 Pyrimidine metabolism fpr01100 Metabolic pathways	fpr Faecalibacterium prausnitzii L2-6	EC 2.4.2.2
	FP2_21100 CDS T02591	(GenBank) Adenine/guanine phosphoribosyltransferases and related PRPP-binding proteins	fpr00230 Purine metabolism fpr01100 Metabolic pathways	fpr Faecalibacterium prausnitzii L2-6	EC 2.4.2.7
	FP2_16080 CDS T02591	(GenBank) hypoxanthine phosphoribosyltransferase	fpr00230 Purine metabolism fpr01100 Metabolic pathways fpr01110 Biosynthesis of secondary metabolites	fpr Faecalibacterium prausnitzii L2-6	EC 2.4.2.8
	FP2_25830 CDS T02591	(GenBank) uracil phosphoribosyltransferase	fpr00240 Pyrimidine metabolism fpr01100 Metabolic pathways	fpr Faecalibacterium prausnitzii L2-6	EC 2.4.2.9
	FP2_15420 CDS T02591	(GenBank) orotate phosphoribosyltransferase, Thermus family	fpr00240 Pyrimidine metabolism fpr01100 Metabolic pathways MODULE fpr_M00051 Uridine monophosphate biosynthesis, glutamine (+ PRPP) => UMP	fpr Faecalibacterium prausnitzii L2-6	EC 2.4.2.10
	FP2_32010 CDS T02591	(GenBank) Orotate phosphoribosyltransferase	fpr00240 Pyrimidine metabolism fpr01100 Metabolic pathways MODULE fpr_M00051 Uridine monophosphate biosynthesis, glutamine (+ PRPP) => UMP	fpr Faecalibacterium prausnitzii L2-6	EC 2.4.2.10
	FP2_01470 CDS T02591	(GenBank) amidophosphoribosyltransferase	fpr00230 Purine metabolism fpr00250 Alanine, aspartate and glutamate metabolism fpr01100 Metabolic pathways fpr01110 Biosynthesis of secondary metabolites fpr01130 Biosynthesis of antibiotics	fpr Faecalibacterium prausnitzii L2-6	EC 2.4.2.14
	FP2_02850 CDS T02591	(GenBank) nicotinate-nucleotide--dimethylbenzimidazole phosphoribosyltransferase	fpr00860 Porphyrin and chlorophyll metabolism fpr01100 Metabolic pathways	fpr Faecalibacterium prausnitzii L2-6	EC 2.4.2.21
	FP2_01800 CDS T02591	(GenBank) xanthine phosphoribosyltransferase	fpr00230 Purine metabolism fpr01100 Metabolic pathways fpr01110 Biosynthesis of secondary metabolites	fpr Faecalibacterium prausnitzii L2-6	EC 2.4.2.22
	FP2_07890 CDS T02591	(GenBank) tRNA-guanine transglycosylase		fpr Faecalibacterium prausnitzii L2-6	EC 2.4.2.29
	FP2_11340 CDS T02591	(GenBank) Pectin methylesterase	fpr00040 Pentose and glucuronate interconversions fpr01100 Metabolic pathways	fpr Faecalibacterium prausnitzii L2-6	EC 3.1.1.11
	FP2_03850 CDS T02591	(GenBank) Uncharacterized conserved protein		fpr Faecalibacterium prausnitzii L2-6	EC 3.1.1.29
	FP2_11230 CDS T02591	(GenBank) peptidyl-tRNA hydrolase		fpr Faecalibacterium prausnitzii L2-6	EC 3.1.1.29
	FP2_08740 CDS T02591	(GenBank) Glycosidases	fpr00052 Galactose metabolism fpr00500 Starch and sucrose metabolism fpr01100 Metabolic pathways	fpr Faecalibacterium prausnitzii L2-6	EC 3.2.1.10
	FP2_08750 CDS T02591	(GenBank) Alpha-glucosidases, family 31 of glycosyl hydrolases	fpr00052 Galactose metabolism fpr00500 Starch and sucrose metabolism fpr01100 Metabolic pathways	fpr Faecalibacterium prausnitzii L2-6	EC 3.2.1.20
	FP2_19180 CDS T02591	(GenBank) Alpha-glucosidases, family 31 of glycosyl hydrolases	fpr00052 Galactose metabolism fpr00500 Starch and sucrose metabolism fpr01100 Metabolic pathways	fpr Faecalibacterium prausnitzii L2-6	EC 3.2.1.20
	FP2_13740 CDS T02591	(GenBank) Beta-glucosidase-related glycosidases	fpr00460 Cyanoamino acid metabolism fpr00500 Starch and sucrose metabolism fpr01100 Metabolic pathways fpr01110 Biosynthesis of secondary metabolites	fpr Faecalibacterium prausnitzii L2-6	EC 3.2.1.21
	FP2_13750 CDS T02591	(GenBank) Beta-glucosidase-related glycosidases	fpr00460 Cyanoamino acid metabolism fpr00500 Starch and sucrose metabolism fpr01100 Metabolic pathways fpr01110 Biosynthesis of secondary metabolites	fpr Faecalibacterium prausnitzii L2-6	EC 3.2.1.21
	FP2_04120 CDS T02591	(GenBank) Beta-galactosidase/beta-glucuronidase	fpr00052 Galactose metabolism fpr00511 Other glycan degradation fpr01100 Metabolic pathways	fpr Faecalibacterium prausnitzii L2-6	EC 3.2.1.23
	FP2_17190 CDS T02591	(GenBank) Beta-galactosidase/beta-glucuronidase	fpr00052 Galactose metabolism fpr00511 Other glycan degradation fpr01100 Metabolic pathways	fpr Faecalibacterium prausnitzii L2-6	EC 3.2.1.23
	FP2_25090 CDS T02591	(GenBank) Beta-galactosidase/beta-glucuronidase	fpr00052 Galactose metabolism fpr00511 Other glycan degradation fpr01100 Metabolic pathways	fpr Faecalibacterium prausnitzii L2-6	EC 3.2.1.23
	FP2_29970 CDS T02591	(GenBank) Beta-galactosidase/beta-glucuronidase	fpr00052 Galactose metabolism fpr00511 Other glycan degradation fpr01100 Metabolic pathways	fpr Faecalibacterium prausnitzii L2-6	EC 3.2.1.23
	FP2_08710 CDS T02591	(GenBank) Beta-fructosidases (levanase/invertase)	fpr00052 Galactose metabolism fpr00500 Starch and sucrose metabolism fpr01100 Metabolic pathways	fpr Faecalibacterium prausnitzii L2-6	EC 3.2.1.26
	FP2_29940 CDS T02591	(GenBank) Beta-galactosidase/beta-glucuronidase	fpr00040 Pentose and glucuronate interconversions fpr00860 Porphyrin and chlorophyll metabolism fpr01100 Metabolic pathways fpr01110 Biosynthesis of secondary metabolites	fpr Faecalibacterium prausnitzii L2-6	EC 3.2.1.31
	FP2_12060 CDS T02591	(GenBank) pullulanase, type I	fpr00500 Starch and sucrose metabolism fpr01100 Metabolic pathways fpr01110 Biosynthesis of secondary metabolites	fpr Faecalibacterium prausnitzii L2-6	EC 3.2.1.41
	FP2_28840 CDS T02591	(GenBank) Beta-glucosidase/6-phospho-beta-glucosidase/beta-galactosid ase	fpr00010 Glycolysis / Gluconeogenesis fpr00500 Starch and sucrose metabolism	fpr Faecalibacterium prausnitzii L2-6	EC 3.2.1.86
	FP2_24180 CDS T02591	(GenBank) Predicted unsaturated glucuronyl hydrolase involved in regulation of bacterial surface properties, and related proteins		fpr Faecalibacterium prausnitzii L2-6	EC 3.2.1.172

## Sheet: fpa and fpr comparison
		SAMEA3138352	SAMEA3138378		...	SAMEA3138352	SAMEA3138378
	...	SL3/3	L2-6		...	SL3/3	L2-6
	FPR_02050	1	0.95276		FP2_01470	1	1
	FPR_03010	1	0.83016		FP2_01800	0.91878	1
	FPR_05900	1	0.81818		FP2_02850	0.82153	1
	FPR_06040	1	0.97115		FP2_03850	0.98667	1
	FPR_06700	1	0.94413		FP2_03890	0.98905	1
	FPR_06900	1	0.98667		FP2_04120	0.66667	1
	FPR_06940	1	0.98905		FP2_07890	0.95013	1
	FPR_07280	1	0.75		FP2_08630	0.88889	1
	FPR_08860	1	0.72727		FP2_08710	0.625	1
	FPR_09740	1	0.75		FP2_08740	0.625	1
	FPR_09750	1	0.83333		FP2_08750	0.81818	1
	FPR_10020	1	0.81905		FP2_09830	0.88703	1
	FPR_10150	1	0.76235		FP2_09890	0.959	1
	FPR_11220	1	0.78165		FP2_11230	1	1
	FPR_12120	1	0.72727		FP2_11340	0.78165	1
	FPR_13470	1	0.91525		FP2_12060	0.76235	1
	FPR_13510	1	0.90992		FP2_13480	0.85714	1
	FPR_14660	1	0.8593		FP2_13740	0.77076	1
	FPR_14930	1	0.85714		FP2_13750	0.71429	1
	FPR_15040	1	0.875		FP2_14400	0.92019	1
	FPR_15320	1	0.6875		FP2_14430	0.91525	1
	FPR_16670	1	0.91878		FP2_15420	0.95939	1
	FPR_16810	1	0.95939		FP2_15900	1	1
	FPR_17200	1	0.76923		FP2_16080	0.9011	1
	FPR_17220	1	0.48148		FP2_17190	0.97955	1
	FPR_17240	1	0.71429		FP2_18390	0.83778	1
	FPR_18380	1	0.92417		FP2_19180	0.5	1
	FPR_20750	1	0.88703		FP2_19420	0.99026	1
	FPR_21480	1	0.93726		FP2_21100	0.94413	1
	FPR_21670	1	0.9011		FP2_24180	1	1
	FPR_21760	1	0.959		FP2_25090	0.8593	1
	FPR_23930	1	0.85714		FP2_25830	0.97115	1
	FPR_23960	1	0.85714		FP2_26860	0.8328	1
	FPR_24180	1	0.83778		FP2_28840	0.7	1
	FPR_25170	1	0.66667		FP2_29940	0.97993	1
	FPR_25320	1	0.97993		FP2_29970	0.875	1
	FPR_25430	1	0.875		FP2_32010	0.92417	1
	FPR_25460	1	0.61538
	FPR_25480	1	0.6
	FPR_25950	1	0.92886
	FPR_27530	1	0.99026
	FPR_27540	1	0.97955
	FPR_29140	1	0.875
	FPR_30570	1	0.95013
