# Supplementary material for: In silico Approach for Unveiling the Glycoside Hydrolase Activities in Faecalibacterium prausnitzii Through a Systematic and Integrative Large-Scale Analysis
Source: Front Microbiol. 2019 Apr 4;10:517. doi: 10.3389/fmicb.2019.00517 (PMC6460054; doi:10.3389/fmicb.2019.00517)
Supplement: TABLE S4 — List of SEED URLs shown for the gene neighbourhood. [file Table_4.XLSX]

## Sheet: fpa
		Table 2. Glycolitic patterns for the clustering model that has F. prausnitzii SL3-3 (fpa) as reference. The metabolic pathway is identified whenever possible; when unknown, the enzymatic activity is disclosed
	Name	Low frequency glycosides	High frequency glycosides
	Cluster 0	Metabolism Nucleotide metabolism Purine metabolism FPR_0670	Metabolism Carbohydrate metabolism Glycolysis / Gluconeogenesis FPR_14930 Starch and sucrose metabolism FPR_14930
		3. Hydrolases 3.1 Acting on ester bonds 3.1.1 Carboxylic-ester hydrolases 3.1.1.29 aminoacyl-tRNA hydrolase FPR_06900	Metabolism Carbohydrate metabolism Starch and sucrose metabolism FPR_13470 Brite Hierarchies Protein families: metabolism Glycosyltransferases [BR:fpa01003] FPR_13470
		2. Transferases 2.4 Glycosyltransferases 2.4.1 Hexosyltransferases 2.4.1.319 beta-1,4-mannooligosaccharide phosphorylase FPR_17240 2.4.1.320 1,4-beta-mannosyl-N-acetylglucosamine phosphorylase FPR_17240
	Cluster 1	2. Transferases 2.4 Glycosyltransferases 2.4.1 Hexosyltransferases 2.4.1.281 4-O-beta-D-mannosyl-D-glucose phosphorylase FPR_17220	Metabolism Nucleotide metabolism Pyrimidine metabolism FPR_21760
		2. Transferases 2.4 Glycosyltransferases 2.4.1 Hexosyltransferases 2.4.1.319 beta-1,4-mannooligosaccharide phosphorylase FPR_17240 2.4.1.320 1,4-beta-mannosyl-N-acetylglucosamine phosphorylase FPR_17240	3. Hydrolases 3.2 Glycosylases 3.2.1 Glycosidases, i.e. enzymes that hydrolyse O- and S-glycosyl compounds 3.2.1.172 unsaturated rhamnogalacturonyl hydrolase FPR_02050
	Cluster 2	Metabolism Carbohydrate metabolism Starch and sucrose metabolism FPR_25480 Metabolism of other amino acids Cyanoamino acid metabolism FPR_25480	Metabolism Nucleotide metabolism Pyrimidine metabolism FPR_06040
			Metabolism Carbohydrate metabolism Starch and sucrose metabolism FPR_21480
	Cluster 3	Metabolism Carbohydrate metabolism Glycolysis / Gluconeogenesis FPR_25170 Starch and sucrose metabolism FPR_25170	Metabolism Carbohydrate metabolism Starch and sucrose metabolism FPR_12120
	Cluster 4		Metabolism Nucleotide metabolism Pyrimidine metabolism FPR_06040
			Metabolism Nucleotide metabolism Purine metabolism FPR_16670
			2. Transferases 2.4 Glycosyltransferases 2.4.1 Hexosyltransferases 2.4.1.25 4-alpha-glucanotransferase FPR_24180
	Cluster 5		Metabolism Nucleotide metabolism Purine metabolism FPR_06940 Pyrimidine metabolism FPR_06940 Metabolism of cofactors and vitamins Nicotinate and nicotinamide metabolism FPR_06940
			2. Transferases 2.4 Glycosyltransferases 2.4.1 Hexosyltransferases 2.4.1.211 1,3-beta-galactosyl-N-acetylhexosamine phosphorylase FPR_27530
			3. Hydrolases 3.1 Acting on ester bonds 3.1.1 Carboxylic-ester hydrolases 3.1.1.29 aminoacyl-tRNA hydrolase FPR_06900

## Sheet: fpr
	Glycolitic patterns for the clustering model that has F. prausnitzii L2-6 (fpr) as reference. The metabolic pathway is identified whenever possible; when unknown, the enzymatic activity is disclosed.
	Name	Low frequency glycosides	High frequency glycosides
	Cluster 0	3. Hydrolases 3.1 Acting on ester bonds 3.1.1 Carboxylic-ester hydrolases 3.1.1.29 aminoacyl-tRNA hydrolase FP2_03850	Metabolism Carbohydrate metabolism Starch and sucrose metabolism FP2_08630
		Metabolism Carbohydrate metabolism Galactose metabolism FP2_19180 Starch and sucrose metabolism FP2_19180
	Cluster 1	Metabolism Nucleotide metabolism Purine metabolism FP2_03890 Pyrimidine metabolism FP2_03890 Metabolism of cofactors and vitamins Nicotinate and nicotinamide metabolism FP2_03890	Metabolism Nucleotide metabolism Purine metabolism FP2_01470 Amino acid metabolism Alanine, aspartate and glutamate metabolism FP2_01470 Brite Hierarchies Protein families: metabolism Peptidases [BR:fpr01002] FP2_01470
		Metabolism Carbohydrate metabolism Glycolysis / Gluconeogenesis FP2_28840 Starch and sucrose metabolism FP2_28840
			Metabolism Nucleotide metabolism Purine metabolism FP2_09830 Pyrimidine metabolism FP2_09830 Metabolism of cofactors and vitamins Nicotinate and nicotinamide metabolism FP2_09830
			3. Hydrolases 3.2 Glycosylases 3.2.1 Glycosidases, i.e. enzymes that hydrolyse O- and S-glycosyl compounds 3.2.1.172 unsaturated rhamnogalacturonyl hydrolase FP2_24180
	Cluster 2	Metabolism Carbohydrate metabolism Galactose metabolism FP2_19180 Starch and sucrose metabolism FP2_19180	Metabolism Nucleotide metabolism Pyrimidine metabolism FP2_25830
	Cluster 3	Metabolism Carbohydrate metabolism Galactose metabolism FP2_19180 Starch and sucrose metabolism FP2_19180	3. Hydrolases 3.2 Glycosylases 3.2.1 Glycosidases, i.e. enzymes that hydrolyse O- and S-glycosyl compounds 3.2.1.172 unsaturated rhamnogalacturonyl hydrolase FP2_24180
	Cluster 4	Metabolism Carbohydrate metabolism Galactose metabolism FP2_19180 Starch and sucrose metabolism FP2_19180	3. Hydrolases 3.2 Glycosylases 3.2.1 Glycosidases, i.e. enzymes that hydrolyse O- and S-glycosyl compounds 3.2.1.172 unsaturated rhamnogalacturonyl hydrolase FP2_24180
	Cluster 5		3. Hydrolases 3.2 Glycosylases 3.2.1 Glycosidases, i.e. enzymes that hydrolyse O- and S-glycosyl compounds 3.2.1.172 unsaturated rhamnogalacturonyl hydrolase FP2_24180

## Sheet: Orthology fpa and fpr
		Only in Faecalibacterium prausnitzii L2-6
		Only in Faecalibacterium prausnitzii SL3/3
	2.4	Glycosyltransferases
		2.4.1	Hexosyltransferases
			2.4.1.1	FP2_15900 glycogen/starch/alpha-glucan phosphorylases	FPR_12120	K00688 PYG; glycogen phosphorylase [EC:2.4.1.1]
					FPR_21480
			2.4.1.4	FP2_08630 Glycosidases		K05341 E2.4.1.4; amylosucrase [EC:2.4.1.4]
			2.4.1.18	FP2_26860 alpha-1	FPR_03010	K00700 GBE1; 1,4-alpha-glucan branching enzyme [EC:2.4.1.18]
				FP2_14400 alpha-1	FPR_13510
			2.4.1.20		FPR_05900 cellobiose phosphorylase	K00702 E2.4.1.20; cellobiose phosphorylase [EC:2.4.1.20]
			2.4.1.21	FP2_14430 glycogen/starch synthases	FPR_13470	K00703 glgA; starch synthase [EC:2.4.1.21]
			2.4.1.25	FP2_18390 4-alpha-glucanotransferase	FPR_10020	K00705 malQ; 4-alpha-glucanotransferase [EC:2.4.1.25]
				FP2_13480 4-alpha-glucanotransferase	FPR_24180
			2.4.1.211	FP2_19420 conserved hypothetical protein TIGR02336	FPR_27530	K15533; 1,3-beta-galactosyl-N-acetylhexosamine phosphorylase [EC:2.4.1.211]
			2.4.1.281		FPR_17220 Predicted glycosylase	K16212 mgp; 4-O-beta-D-mannosyl-D-glucose phosphorylase [EC:2.4.1.281]
			2.4.1.319		FPR_17240 Predicted glycosylase	K18785 mp2; beta-1,4-mannooligosaccharide/beta-1,4-mannosyl-N-acetylglucosamine phosphorylase
			2.4.1.320
		2.4.2	Pentosyltransferases
			2.4.2.1	FP2_03890 purine nucleoside phosphorylase I	FPR_06940	K03783 punA; purine-nucleoside phosphorylase [EC:2.4.2.1]
				FP2_09830 purine-nucleoside phosphorylase	FPR_20750	K03784 deoD; purine-nucleoside phosphorylase [EC:2.4.2.1]
			2.4.2.2	FP2_09890 thymidine phosphorylase	FPR_21760	K00756 pdp; pyrimidine-nucleoside phosphorylase [EC:2.4.2.2]
			2.4.2.7	FP2_21100 Adenine/guanine phosphoribosyltransferases and related PRPP-bin	FPR_06700	K00759 APRT; adenine phosphoribosyltransferase [EC:2.4.2.7]
			2.4.2.8	FP2_16080 hypoxanthine phosphoribosyltransferase	FPR_21670	K00760 hprT; hypoxanthine phosphoribosyltransferase [EC:2.4.2.8]
			2.4.2.9	FP2_25830 uracil phosphoribosyltransferase	FPR_06040	K00761 upp; uracil phosphoribosyltransferase [EC:2.4.2.9]
			2.4.2.10	FP2_15420 orotate phosphoribosyltransferase	FPR_16810	K00762 pyrE; orotate phosphoribosyltransferase [EC:2.4.2.10]
				FP2_32010 Orotate phosphoribosyltransferase	FPR_18380
			2.4.2.14	FP2_01470 amidophosphoribosyltransferase	FPR_25950	K00764 purF; amidophosphoribosyltransferase [EC:2.4.2.14]
			2.4.2.21	FP2_02850 nicotinate-nucleotide--dimethylbenzimidazole phosphoribosyltransferase	FPR_29140	K00768 E2.4.2.21; nicotinate-nucleotide--dimethylbenzimidazole phosphoribosyltransferase [EC:2.4.2.21]
			2.4.2.22	FP2_01800 xanthine phosphoribosyltransferase	FPR_16670	K03816 xpt; xanthine phosphoribosyltransferase [EC:2.4.2.22]
			2.4.2.29	FP2_07890 tRNA-guanine transglycosylase	FPR_30570	K00773 tgt; queuine tRNA-ribosyltransferase [EC:2.4.2.29]
	3.1	Acting on ester bonds
		3.1.1	Carboxylic-ester hydrolases
			3.1.1.11	FP2_11340 Pectin methylesterase	FPR_11220	K01051 E3.1.1.11; pectinesterase [EC:3.1.1.11]
			3.1.1.29	FP2_11230 peptidyl-tRNA hydrolase	FPR_15040	K01056 PTH1; peptidyl-tRNA hydrolase, PTH1 family [EC:3.1.1.29]
				FP2_03850 Uncharacterized conserved protein	FPR_06900	K04794 PTH2; peptidyl-tRNA hydrolase, PTH2 family [EC:3.1.1.29]
	3.2	Glycosylases
		3.2.1	Glycosidases, i.e. enzymes that hydrolyse O- and S-glycosyl compounds
			3.2.1.10	FP2_08740 Glycosidases		K01182 IMA; oligo-1,6-glucosidase [EC:3.2.1.10]
			3.2.1.20	FP2_08750 Alpha-glucosidases	FPR_07280	K01187 malZ; alpha-glucosidase [EC:3.2.1.20]
				FP2_19180 Alpha-glucosidases		K01187 malZ; alpha-glucosidase [EC:3.2.1.20]
			3.2.1.21	FP2_13740 Beta-glucosidase-related glycosidases	FPR_09740	K05349 bglX; beta-glucosidase [EC:3.2.1.21]
				FP2_13750 Beta-glucosidase-related glycosidases	FPR_09750
					FPR_25480 aryl-beta-glucosidase	K05350 bglB; beta-glucosidase [EC:3.2.1.21]
			3.2.1.22		FPR_17200 Alpha-galactosidase	K07407 E3.2.1.22B; alpha-galactosidase [EC:3.2.1.22]
					FPR_23960 Alpha-galactosidase
			3.2.1.23	FP2_25090 Beta-galactosidase/beta-glucuronidase	FPR_14660	K01190 lacZ; beta-galactosidase [EC:3.2.1.23]
				FP2_04120 Beta-galactosidase/beta-glucuronidase	FPR_23930
				FP2_29970 Beta-galactosidase/beta-glucuronidase	FPR_25460
				FP2_17190 Beta-galactosidase/beta-glucuronidase	FPR_27540
			3.2.1.26	FP2_08710 Beta-fructosidases (levanase/invertase)		K01193 INV; beta-fructofuranosidase [EC:3.2.1.26]
			3.2.1.31	FP2_29940 Beta-galactosidase/beta-glucuronidase	FPR_25320	K01195 uidA; beta-glucuronidase [EC:3.2.1.31]
			3.2.1.40		FPR_25430 Alpha-L-rhamnosidase N-terminal domain./Bacterial alpha-L-rhamnosidase.	K05989 ramA; alpha-L-rhamnosidase [EC:3.2.1.40]
			3.2.1.41	FP2_12060 pullulanase	FPR_10150	K01200 pulA; pullulanase [EC:3.2.1.41]
			3.2.1.86	FP2_28840 Beta-glucosidase/6-phospho-beta-glucosidase/beta-galactosid ase	FPR_14930	K01223 E3.2.1.86B; 6-phospho-beta-glucosidase [EC:3.2.1.86]
					FPR_15320
					FPR_25170
			3.2.1.122		FPR_08860 Alpha-galactosidases/6-phospho-beta-glucosidases	K01232 glvA; maltose-6'-phosphate glucosidase [EC:3.2.1.122]
			3.2.1.172	FP2_24180 Predicted unsaturated glucuronyl hydrolase involved in regulati	FPR_02050	K15532 yteR; unsaturated rhamnogalacturonyl hydrolase [EC:3.2.1.172]
